# Supplementary material for: Effect of Ranolazine on A1C and Glucose Levels in Hyperglycemic Patients With Non-ST Elevation Acute Coronary Syndrome
Source: PubMed Central journal article supplement — Diabetes Care. 2010 Mar 31;33(6):1163–8. doi: 10.2337/dc09-2334 (PMC2875416; doi:10.2337/dc09-2334), 2010-03-31
Supplement: supp_dc09-2334_dc092334_Online_appendix_corrected.pdf [file supp_dc09-2334_dc092334_Online_appendix_corrected.pdf]

**Online Appendix Table A1-** Number of patients with HbA1c and FPG data at randomization and month 4

|       | All Patients        |                        | No Diabetes         |                        | Diabetes           |                       |
|-------|---------------------|------------------------|---------------------|------------------------|--------------------|-----------------------|
|       | Placebo<br>(n=2679) | Ranolazine<br>(n=2565) | Placebo<br>(n=1787) | Ranolazine<br>(n=1723) | Placebo<br>(n=892) | Ranolazine<br>(n=842) |
|       | n (%)               | n (%)                  | n (%)               | n (%)                  | n (%)              | n (%)                 |
| HbA1c | 2198 (82%)          | 2108 (82%)             | 1428 (80%)          | 1401 (81%)             | 770 (86%)          | 707 (84%)             |
| FPG   | 932 (35%)           | 922 (36%)              | 604 (34%)           | 612 (36%)              | 328 (37%)          | 310 (37%)             |

**Online Appendix Table A2-** Effect of ranolazine between month 0 and 4 for patients without a history of DM and possible new or undiagnosed DM

**Patients with possible new DM at randomization (FPG≥126-400)**

|                   | FPG Month 0<br>(mg/dl)            | Change in FPG 0 to month 4<br>(mg/dl) |
|-------------------|-----------------------------------|---------------------------------------|
| <b>Placebo</b>    | 148.0 (95%CI: 140.5, 155.6, n=60) | -44.2 (95%CI: -53.8, -34.6, n=60)     |
| <b>Ranolazine</b> | 151.7 (95%CI: 143.5, 159.9, n=68) | -48.1 (95%CI: -56.7, -39.5, n=68)     |

\*p=0.523

**Patients with possible new DM at randomization (HbA1c ≥6.5-10%)**

|                   | HbA1c Month 0<br>(%)         | Change in HbA1c 0 to month 4<br>(%) |
|-------------------|------------------------------|-------------------------------------|
| <b>Placebo</b>    | 7.3 (95%CI: 7.2, 7.4, n=185) | -0.54 (95%CI: -0.74, -0.34, n=185)  |
| <b>Ranolazine</b> | 7.2 (95%CI: 7.1, 7.4, n=178) | -0.93 (95%CI: -1.12, -0.73, n=178)  |

Δ -0.39%, \*p=0.007

\*Paired t-test  
Mean, 95% Confidence interval and n

**Online Appendix Table A3-** HbA1c at randomization for patients with diabetes subgrouped by treatment for diabetes

|                        | Placebo     |               | Ranolazine  |               |
|------------------------|-------------|---------------|-------------|---------------|
|                        | n (%)       | HbA1c (%)     | n (%)       | HbA1c (%)     |
| Patients with diabetes | 770         | 7.4 (7.2,7.5) | 707         | 7.5 (7.3,7.6) |
| <b>Subgroups</b>       |             |               |             |               |
| No anti-diabetic drugs | 128 (16.6%) | 6.4 (6.2,6.7) | 134 (19.0%) | 6.5 (6.2,6.8) |
| OHA                    | 425 (55.2%) | 7.4 (7.2,7.6) | 380 (53.7%) | 7.4 (7.3,7.6) |
| Insulin +/- OHA        | 217 (28.2%) | 7.9 (7.7,8.2) | 193 (27.3%) | 8.2 (7.9,8.5) |

All patients had HbA1c values at 0 and 4 months  
Mean HbA1c % (95% Confidence Interval)  
OHA- Oral hypoglycemic agents

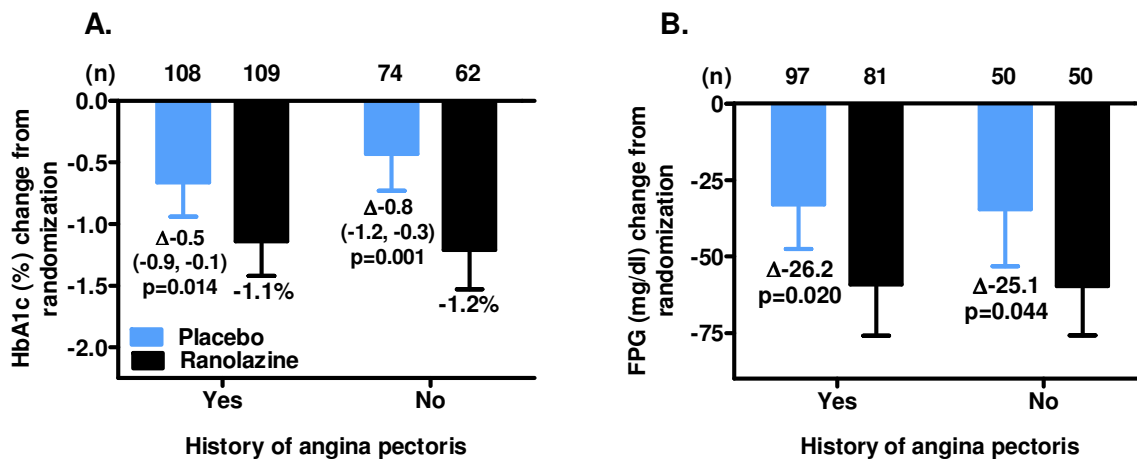

**Online Appendix Figure 1-** Effect of ranolazine on HbA1c and FPG in patients with DM, hyperglycemia and with (yes) or without (no) a history of angina pectoris.

(A). The placebo-adjusted effect of ranolazine on HbA1c in patients with hyperglycemia (HbA1c  $\geq$  8-10% at randomization) and a history of angina was -0.5% (95%CI: -0.9 to -0.1,  $p=0.014$ ) and -0.8% (95%CI: -1.2 to -0.3,  $p<0.001$ ) for patients with no history of angina. The placebo corrected effect of ranolazine on HbA1c was independent of a history of angina ( $p=0.213$ ). The absolute HbA1c reduction in ranolazine treated patients with and without angina was 1.1% (95%CI: -1.4 to -0.9) and 1.2% (95%CI: -1.5 to -0.9) respectively. (B.) The placebo-adjusted effect of ranolazine on FPG in hyperglycemic patients (FPG  $\geq$  150-400 mg/dl at randomization) with a history of angina was -26.2 mg/dl (95%CI: -48.2 to -4.3,  $p=0.020$ ) and -25.1 mg/dl (95%CI: -49.5 to -0.7,  $p=0.044$ ) for patients with no history of angina. The placebo corrected effect of ranolazine on FPG was independent of a history of angina ( $p=0.408$ ). The absolute FPG reduction in ranolazine treated patients with and without angina was -59.2 mg/dl (95%CI: -75.9 to -42.4) and -59.6 mg/dl (95%CI: -75.8 to -59.6) respectively. Changes in HbA1c and FPG at month 4 are summarized by mean, associated 95%CI and number of patients (n).

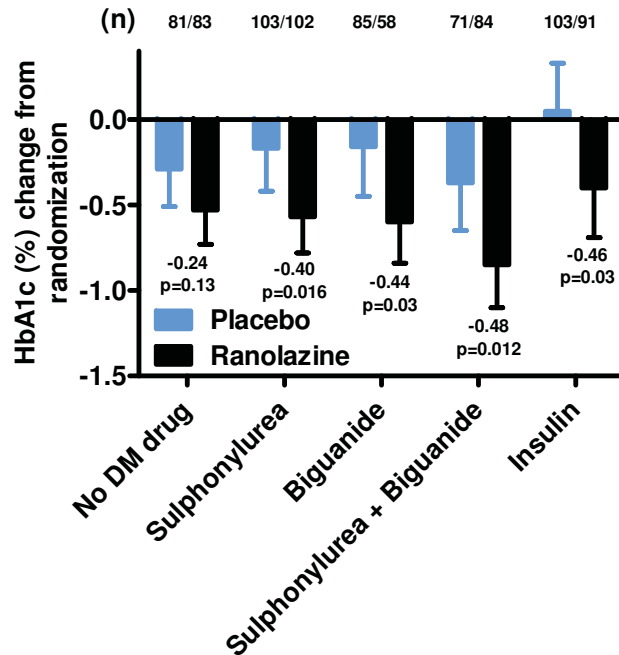

**Online Appendix Figure 2- Change in HbA1c from month 0 to 4 for patients with a history of DM by major concomitant hypoglycemic agent(s).**

(A). The placebo-adjusted effect of ranolazine on HbA1c for patients with DM and an HbA1c at randomization of  $\geq 6$ -10% by major concomitant hypoglycemic agent were as follows: No DM drug -0.24% (95%CI: -0.54, 0.07,  $p=0.13$ ); sulphonylurea only -0.40%, (95%CI: -0.72, -0.07,  $p=0.016$ ); biguanide only (metformin) -0.44%, (95%CI: -0.84, -0.04,  $p=0.0326$ ); sulphonylurea and biguanide -0.48%, (95%CI: -0.86, -0.11,  $p=0.012$ ); insulin (any form) -0.46%, (95%CI: -0.86, -0.05,  $p=0.027$ ). Changes in HbA1c and FPG at month 4 are summarized by mean, 95% confidence interval, p-value (paired t-test) and n.
